# Supplementary material for: A double-layer dura mater based on poly(caprolactone-co-lactide) film and polyurethane sponge: preparation, characterization, and biodegradation study
Source: Royal Society of Chemistry journal article supplement (doi:10.1039/d1tb00454a), 2021-01-01
Supplement: d1tb00454a1.pdf [file d1tb00454a1.pdf]

Supporting information of

**Double-layer dura mater based on poly(caprolactone-*co*-lactide) film and polyurethane sponge: preparation, characterization, and biodegradation study**

Shu Jin,<sup>a</sup> Yuji Pu,<sup>b</sup> Zhaoyuan Guo,<sup>b</sup> Wangwei Zhu,<sup>b</sup> Sai Li<sup>a\*</sup>, Xi Zhou,<sup>c</sup>  
Wenxia Gao,<sup>d</sup> and Bin He<sup>b\*</sup>

<sup>a</sup> School of Chemical Engineering, Sichuan University, Chengdu 610065, China

<sup>b</sup> National Engineering Research Center for Biomaterials, College of Biomedical Engineering, Sichuan University, Chengdu 610064, China

<sup>c</sup> Ningbo Baoting Biotechnology Co., Ltd, Ningbo 315001, China

<sup>d</sup> College of Chemistry & Materials Engineering, Wenzhou University, Wenzhou 325027, China

E-mail: [lisai@scu.edu.cn](mailto:lisai@scu.edu.cn); [bhe@scu.edu.cn](mailto:bhe@scu.edu.cn)

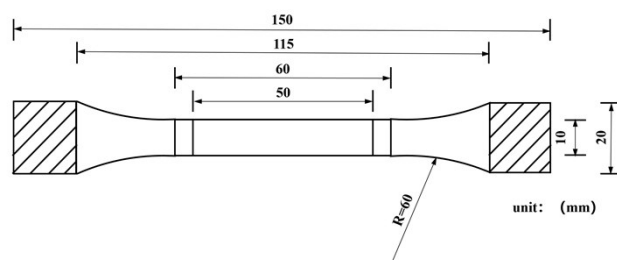

**Figure S1.** Tensile splines for mechanical properties research.

**Table S1** Theoretical and actual composition of PCLA.

| Samples     | Feeding weight(g)                                   |                                                    | Theoretical molar ratio of LLA / CL | Actual molar ratio of LLA / CL( <sup>1</sup> H-NMR) |
|-------------|-----------------------------------------------------|----------------------------------------------------|-------------------------------------|-----------------------------------------------------|
|             | LLA ( $M=144 \text{ g}\cdot\text{mol}^{-1}$ )<br>1) | CL ( $M=114 \text{ g}\cdot\text{mol}^{-1}$ )<br>1) |                                     |                                                     |
| PCLA(75:25) | 108                                                 | 28.5                                               | 75/25                               | 78.74/21.26                                         |
| PCLA(70:30) | 100.8                                               | 34.2                                               | 70/30                               | 73.53/26.47                                         |

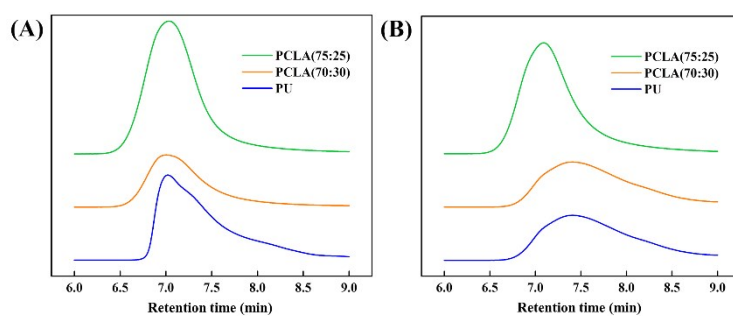

**Figure S2.** GPC traces of polymers in this study: (A) Before degradation; (B) After degradation

**Table S2** FTIR results of the materials.

| Wavenumber (cm <sup>-1</sup> ) | Groups    |                                                       |
|--------------------------------|-----------|-------------------------------------------------------|
| Figure 2A                      | 2998      | symmetrical stretching vibration of -CH-              |
|                                | 2944      | antisymmetric stretching vibration of -CH-            |
|                                | 1457      | flexural vibration of -CH-                            |
|                                | 1386      | flexural vibration of -CH <sub>3</sub>                |
|                                | 755       | flexural vibration of -CH <sub>2</sub> -              |
|                                | 1760      | stretching vibration of C=O                           |
|                                | 1186,1135 | stretching vibration of C-O                           |
| Figure 2B                      | 1143,1132 | stretching vibration of C-O                           |
|                                | 2875      | asymmetric stretching of -OCH <sub>2</sub> -          |
|                                | 949       | blending peak of -CH <sub>2</sub> -CH <sub>2</sub> -O |
|                                | 1096      | asymmetric stretching of C-O-C                        |
|                                | 1044      | symmetric stretching of C-O-C                         |
|                                | 1734      | stretching vibration of C=O in PCL                    |
|                                | 1246      | stretching vibration of C-O-C                         |
|                                | 1756      | stretching peak of C=O in PLA                         |
|                                | 1249      | asymmetric stretching of OC-O-C                       |
|                                | 1187      | stretching peak of OC-O                               |
|                                | 754       | bending peak of OC-O-                                 |
|                                | 1453      | asymmetric bending peak of -CH <sub>3</sub>           |
|                                | 1723      | free C=O of the carbamate group in PU                 |

**Table S3** Molecular properties of polymers.

| Polymers    | $M_w$ (10 <sup>3</sup> ) | $M_n$ (10 <sup>3</sup> ) | $M_w/M_n$ | Appearance       |
|-------------|--------------------------|--------------------------|-----------|------------------|
| PCLA(75:25) | 67.1                     | 48.0                     | 1.40      | flocculent solid |
| PCLA(70:30) | 61.5                     | 44.5                     | 1.38      | flocculent solid |
| PU          | 29.7                     | 18.5                     | 1.61      | flocculent solid |

**Table S4** Molecular weight of polymers before and after in vitro degradation.

| Samples     | Molecular weight                | Molecular weight               | Reduction rate (%) |
|-------------|---------------------------------|--------------------------------|--------------------|
|             | before degradation <sup>a</sup> | after degradation <sup>a</sup> |                    |
|             | (10 <sup>3</sup> )              | (10 <sup>3</sup> )             |                    |
| Film(75:25) | 67.1                            | 57.9                           | 14.7               |
| Film(70:30) | 61.5                            | 43.6                           | 29.1               |
| Sponge      | 42.1                            | 29.7                           | 29.4               |

a. Determined by GPC.

**Table S5** Water absorption rates of different materials at 10 min.

| Samples            | Water absorption rate at 10 min |
|--------------------|---------------------------------|
|                    | (%)                             |
| Film(75:25)        | 0.80                            |
| Film(70:30)        | 1.14                            |
| Sponge             | 586                             |
| Film(75:25)@Sponge | 490                             |
| Film(70:30)@Sponge | 531                             |

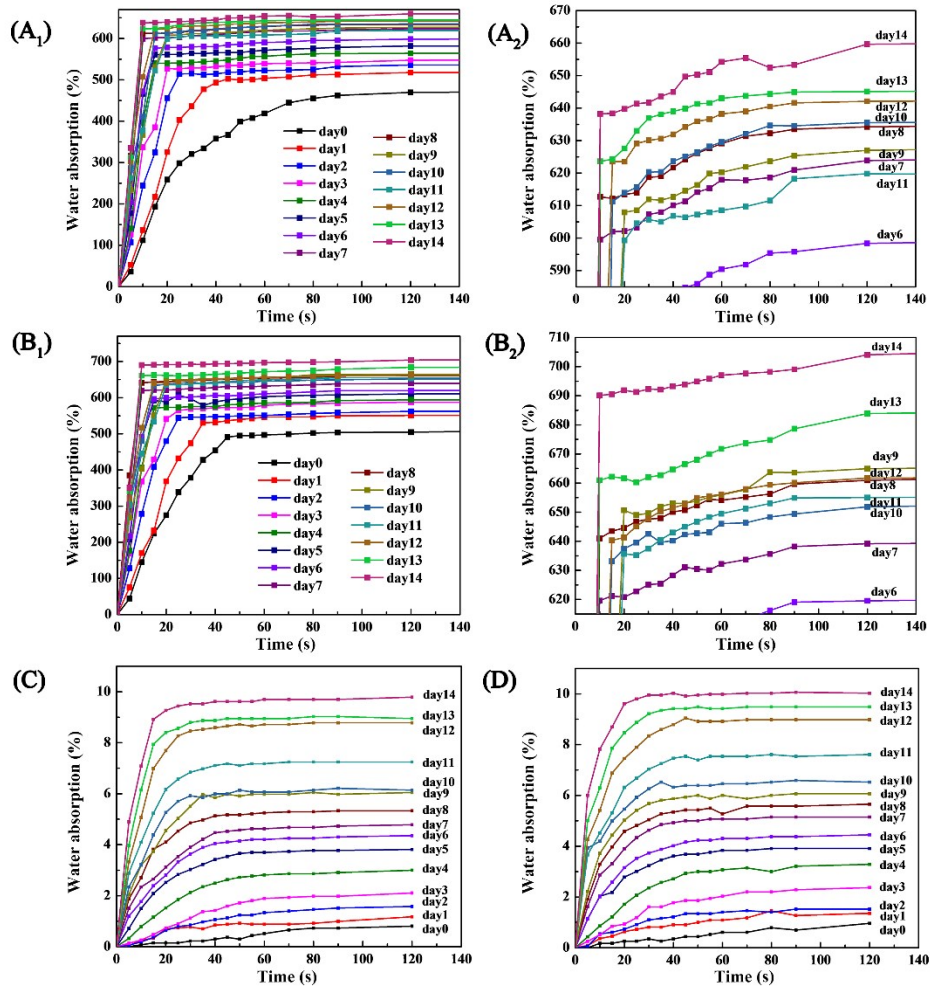

**Figure S3.** Changes in water absorption speed of materials: (A) Film(75:25)@Sponge; (B) Film(70:30)@Sponge; (C) Film(75:25); (D) Film(70:30).
